# Supplementary material for: Si–OH Nest and Al Distribution of Silicalite-1 Core/Al-ZSM-5 Shell Zeolites for Methane Dehydroaromatization Reaction
Source: MDPI journal article supplement (doi:10.3390/cryst11060647), 2021-06-08
Supplement: s1 [file s1]

## Supplementary

Article

# Si–OH Nest and Al Distribution of Silicalite-1 Core/Al-ZSM-5 Shell Zeolites for Methane Dehydroaromatization Reaction

Do-Young Hong <sup>1</sup>, Hyun Su Kim <sup>2,3</sup>, Haoxiang Zhang <sup>2</sup>, Su Kyung Kang <sup>2</sup>, Elsa Tsegay Tikue <sup>3</sup>  
and Pyung Soo Lee <sup>2,3,\*</sup>

<sup>1</sup> Research Center for Nanocatalysts, Korea Research Institute of Chemical Technology (KRICT), 141, Gajeongro, Daejeon 34114, Korea; dyhong@kRICT.re.kr (D.-Y.H.); tsegayelsa22@gmail.com (E.T.T.)

<sup>2</sup> Department of Chemical Engineering and Material Science, Chung-Ang University, 84, Heukseok-ro, Seoul 06974, Korea; shfkstmzl@naver.com (H.S.K.); hansel931022@gmail.com (H.Z.); love8416509@naver.com (S.K.K.)

<sup>3</sup> Department of Intelligent Energy and Industry, Chung-Ang University, 84, Heukseok-ro, Seoul 06974, Korea

\* Correspondence: [leeps@cau.ac.kr](mailto:leeps@cau.ac.kr); Tel.: +82-2-820-5939

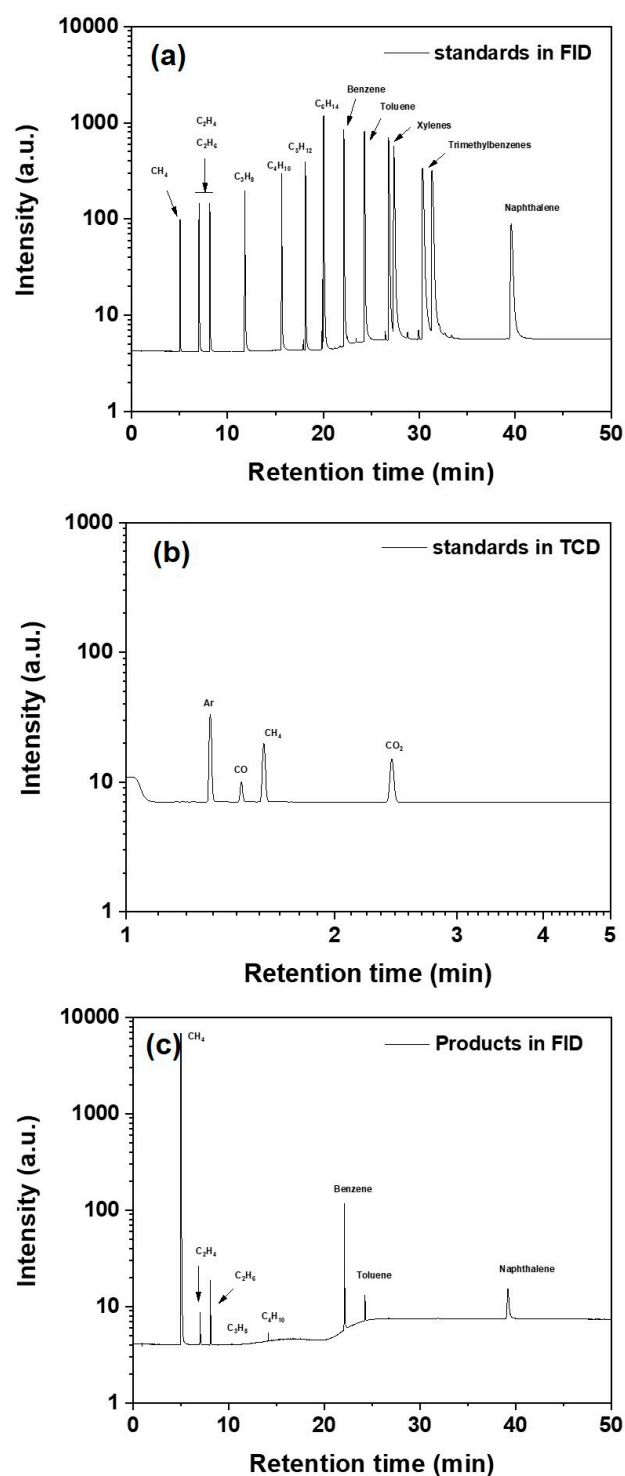

**Figure S1.** Calibration data of GC using standard gas mixture. GC peaks from stand gas mixture by FID and bu GC peaks, and (c) GC peaks from a reaction product by FID.

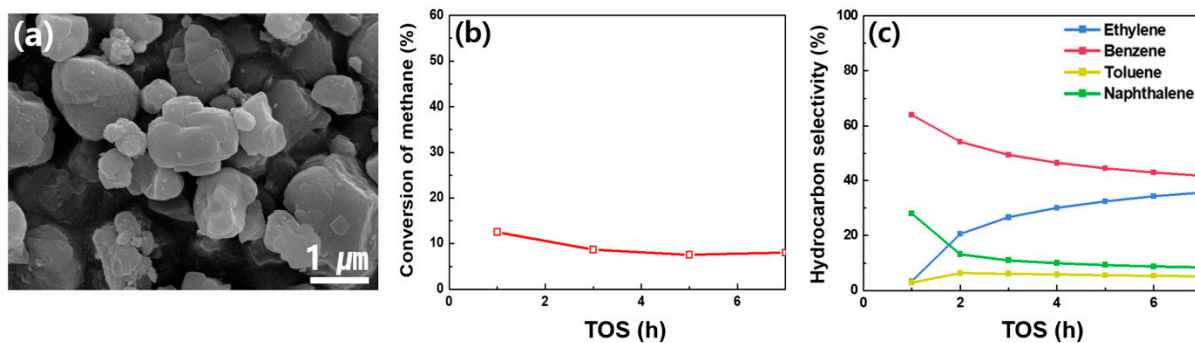

**Figure S2.** Properties of the commercial zeolite with SAR = 120 (a) SEM image and (b) methane conversion efficiency and (c) hydrocarbon selectivity as the functions of the TOS.
